# Supplementary material for: Online Survival Analysis Software to Assess the Prognostic Value of Biomarkers Using Transcriptomic Data in Non-Small-Cell Lung Cancer
Source: PLoS One. 2013 Dec 18;8(12):e82241. doi: 10.1371/journal.pone.0082241 (PMC3867325; doi:10.1371/journal.pone.0082241)
Supplement: Table S1 — List of genes involved in previously published gene sets. (XLS) [file pone.0082241.s001.xls]

## Sheet: signatures
50-gene	15-gene	17-gene	139-gene	59-gene	6-gene	38-gene
TIA1	201243_s_at	1553300_a_at	208789_at	H3F3A	CALB1	200722_s_at
BID	202490_at	1557638_at	209409_at	HNRNPK	MMP7	201476_s_at
MAP4	202707_at	201123_s_at	219764_at	HSPD1	SLC1A7	201868_s_at
CASK	202814_s_at	203634_s_at	205266_at	DEK	GSTA1	201998_at
EVI1	203001_s_at	206262_at	217733_s_at	CBX3	CCL19	202601_s_at
PPFIBP2	203147_s_at	206581_at	209310_s_at	NBPF15	IFI44	203280_at
MS4A1	204179_at	206985_at	202284_s_at	ATP1B1		203294_s_at
RAB6A	204584_at	208459_s_at	36907_at	NDUFAB1		204153_s_at
HRB	205386_s_at	210839_s_at	203502_at	NUP153		204596_s_at
PTPN18	206426_at	227115_at	218211_s_at	CTSH		206150_at
CCL11	208399_s_at	231487_at	35846_at	KIAA0101		206667_s_at
FGFR2	210016_at	231916_at	208025_s_at	PLOD2		206748_s_at
MAPK14	218881_s_at	232120_at	206023_at	LSM5		207379_at
MARK1	219171_s_at	233044_at	214404_x_at	NBN		207495_at
GGA3	221591_s_at	233488_at	201041_s_at	MTIF2		207590_s_at
EDG2		236646_at	202954_at	PSMA4		208168_s_at
NPHP4		237510_at	201761_at	TBCA		208451_s_at
RAB11A			200799_at	CLPX		209459_s_at
LGALS8			209351_at	HNRNPA2B1		209460_at
AASS			213345_at	DBT		210257_x_at
HMBS			213453_x_at	SNRPG		211178_s_at
ABCC4			205139_s_at	SNRPA1		211485_s_at
DPAGT1			212657_s_at	DDX17		212594_at
C9ORF77			221750_at	MRPL3		213138_at
PMA1			210512_s_at	HMGB2		213416_at
ALG8			211817_s_at	CYCS		214428_x_at
PSMC2			204470_at	NFIB		215064_at
CPA3			202847_at	ATP5I		215161_at
ANKRD12			201695_s_at	RGL1		215458_s_at
SPAST			201329_s_at	CBLB		217332_at
ZNF552			208875_s_at	ZMYM2		217383_at
ZNF189			205278_at	TUBA1B		217838_s_at
RPLP0			200632_s_at	BLVRA		218881_s_at
BMS1L			201860_s_at	LARP1		219251_s_at
HLF			214014_at	MED13L		219399_at
FLJ23441			222245_s_at	IDS		219617_at
HT007			216250_s_at	GNS		220295_x_at
LRIG1			205184_at	ATP6V0A1		221638_s_at
PELI2			212977_at	FCF1
MGC5306			204183_s_at	ABCC10
FLJ20397			209283_at	SFTPB
YPEL5			203821_at	BTF3
C1ORF115			208937_s_at	CYB5A
KIAA0746			214895_s_at	UBE2J1
217227_x_at			204014_at	HIGD1A
			205180_s_at	NUSAP1
			202168_at	CCDC90B
			205890_s_at	CCDC59
			221489_s_at	OLA1
			209195_s_at	FBXO38
			210428_s_at	DENR
			204268_at	ANGEL2
			218346_s_at	N4BP2L2
			210338_s_at	MCM4
			203574_at	EZH1
			204855_at	KIAA0240
			200790_at	SIDT2
			222223_s_at	DNAJC21
			205132_at	YPEL5
			201289_at
			213721_at
			209765_at
			208152_s_at
			204580_at
			202936_s_at
			221931_s_at
			221359_at
			203859_s_at
			207828_s_at
			219361_s_at
			220407_s_at
			210357_s_at
			208649_s_at
			211488_s_at
			216061_x_at
			210118_s_at
			205718_at
			202555_s_at
			219836_at
			201058_s_at
			208774_at
			211048_s_at
			209147_s_at
			203752_s_at
			200693_at
			206538_at
			201841_s_at
			203921_at
			201150_s_at
			210095_s_at
			222236_s_at
			209732_at
			221920_s_at
			203879_at
			205264_at
			206753_at
			204115_at
			203851_at
			215111_s_at
			206400_at
			209101_at
			204475_at
			203737_s_at
			202068_s_at
			209457_at
			212984_at
			209803_s_at
			202464_s_at
			213603_s_at
			221059_s_at
			209230_s_at
			219995_s_at
			202718_at
			205828_at
			202539_s_at
			210511_s_at
			201631_s_at
			204420_at
			207760_s_at
			201820_at
			204011_at
			211936_at
			208727_s_at
			203037_s_at
			200746_s_at
			206714_at
			211597_s_at
			205749_at
			203710_at
			207351_s_at
			212942_s_at
			33304_at
			201802_at
			209118_s_at
			213283_s_at
			200072_s_at
			201141_at
			208645_s_at
			201194_at
